# Supplementary material for: Synthesis and coordination behavior of CuI bis(phosphaethenyl)pyridine complexes
Source: Royal Society of Chemistry journal article supplement (doi:10.1039/c1cc11315a), 2011-01-01
Supplement: c1cc11315a.pdf [file c1cc11315a.pdf]

Supplementary Information

# Synthesis and coordination behavior of Cu<sup>I</sup> bis(phosphaethenyl)pyridine complexes

Yumiko Nakajima,<sup>a,b</sup> Yu Shiraishi,<sup>b</sup> Takahiro Tsuchimoto<sup>b</sup> and Fumiyuki Ozawa<sup>a,b</sup>

<sup>a</sup> International Research Center for Elements Science (IRCELS), Institute for Chemical Research, Kyoto University, Uji, Kyoto 611-0011, Japan.

<sup>b</sup> Department of Energy and Hydrocarbon Chemistry, Graduate School of Engineering, Kyoto University, Uji, Kyoto 611-0011, Japan.

E-mail: nakajima@scl.kyoto-u.ac.jp, ozawa@scl.kyoto-u.ac.jp

## Contents

### Experimental Section

- Table S1** Crystallographic data for **1**, **2a**, **3**, **4**, **6**, **7a**  
**Fig. S1** ORTEP drawing of **1** with 50% probability ellipsoids  
**Table S2** Selected bond lengths (Å) and angles (deg) for **1**  
**Fig. S2** ORTEP drawing of **2a** with 50% probability ellipsoids  
**Table S3** Selected bond lengths (Å) and angles (deg) for **2a**  
**Fig. S3** ORTEP drawing of **3** with 50% probability ellipsoids  
**Table S4** Selected bond lengths (Å) and angles (deg) for **3**  
**Fig. S4** ORTEP drawing of **4** with 50% probability ellipsoids  
**Table S5** Selected bond lengths (Å) and angles (deg) for **4**  
**Fig. S5** ORTEP drawing of **6** with 50% probability ellipsoids  
**Table S6** Selected bond lengths (Å) and angles (deg) for **6**  
**Fig. S6** ORTEP drawing of **7a** with 50% probability ellipsoids

### Computational Details

- Fig. S 7** Optimized geometry of **6'** (a) and **6'<sup>FREE</sup>** (b)  
**Table S7** Selected bond lengths and angles of **6'** and **6'<sup>FREE</sup>**  
**Table S8** Absolute total energies (in Hartree) of **6'** and **6'<sup>FREE</sup>**  
**Table S9** Natural charge by NBO analysis  
**Table S10** Mayer's bond order  
**Fig. S8** Imaginary frequency of **6'**  
**Fig. S9** Imaginary frequency of **6'<sup>FREE</sup>** (−15.86 *i* cm<sup>−1</sup>)  
**Fig. S10** Selected Kohn-sham orbitals of **6'** including orbital overlaps between Cu and PF<sub>6</sub>  
**Table S11** Cartesian coordinates of **6'**  
**Table S12** Cartesian coordinates of **6'<sup>FREE</sup>**  
**Table S13** Cartesian coordinates of [Cu(BPEP)]<sup>+</sup>  
**Table S14** Cartesian coordinates of PF<sub>6</sub><sup>−</sup>

### References

## Experimental Section

**General Considerations.** All manipulations were performed under a dry and oxygen-free dinitrogen atmosphere using Schlenk techniques or a glove box. Solvents were dried over sodium/benzophenone ketyl (toluene, benzene, pentane, Et<sub>2</sub>O) or CaH<sub>2</sub> (CH<sub>2</sub>Cl<sub>2</sub>) and distilled. CuBr (Wako), AgPF<sub>6</sub>, AgSbF<sub>6</sub> (Strem), and Me<sub>3</sub>SiN<sub>3</sub> (Sigma-Aldrich) were obtained from commercial sources and used without purification. BPEP was prepared according to the literature method.<sup>1</sup>

<sup>1</sup>H NMR spectra were recorded on a Bruker AVANCHE 400 spectrometer (<sup>1</sup>H NMR, 400.13 MHz; <sup>13</sup>C NMR, 100.62 MHz; <sup>19</sup>F NMR, 376.46 MHz; <sup>31</sup>P NMR, 161.98 MHz). Chemical shifts are reported in δ (ppm), referenced to <sup>1</sup>H (residual) and <sup>13</sup>C signals of deuterated solvents as internal standards or to the <sup>19</sup>F signal of C<sub>6</sub>F<sub>6</sub> (δ -163.0) and the <sup>31</sup>P signal of 85% H<sub>3</sub>PO<sub>4</sub> (δ 0.0) as external standards. Elemental analysis was performed by the ICR Analytical Laboratory, Kyoto University. IR spectra were recorded on a JASCO FT/IR-410 spectrometer.

**Preparation of [CuBr(BPEP)] (1).** A mixture of CuBr (35.6 mg, 24.7 μmol) and BPEP (200.2 mg, 24.8 μmol) in toluene (6 mL) was heated at 90 °C for 12 h. The solvent was removed under reduced pressure at room temperature. The residue was washed with hexane, dissolved in toluene, and filtered through a celite pad. The filtrate was concentrated to dryness to afford a dark green solid of **1**, which was analytically pure (232.2 mg, 24.4 μmol, 99%). <sup>1</sup>H NMR (C<sub>6</sub>D<sub>6</sub>, 20 °C): δ 1.32 (18H, s), 1.66 (36H, s), 6.81 (4H, m), 6.92 (4H, m), 7.01 (1H, t, *J* = 9.8 Hz), 7.27 (4H, d, *J* = 8.0 Hz), 7.48 (4H, s). <sup>13</sup>C{<sup>1</sup>H} NMR (C<sub>6</sub>D<sub>6</sub>, 20 °C): δ 31.7, 35.2, 35.5, 39.9, 123.2, 123.7, 126.0, 127.7, 129.7, 131.5, 134.3, 139.6, 153.0, 156.7, 157.3, 167.9. <sup>31</sup>P{<sup>1</sup>H} NMR (20 °C): δ 251.5 (C<sub>6</sub>D<sub>6</sub> and CD<sub>2</sub>Cl<sub>2</sub>). Anal. Found: C, 69.12; H, 7.61; N, 1.40. Calcd for C<sub>55</sub>H<sub>71</sub>BrCuNP<sub>2</sub>: C, 69.42; H, 7.52; N, 1.47. Single crystals suitable for X-ray diffraction analysis were obtained by slow diffusion of pentane into a CH<sub>2</sub>Cl<sub>2</sub> solution of **1**.

**Preparation of [Cu(SbF<sub>6</sub>)(BPEP)] (2a).** A suspension of AgSbF<sub>6</sub> (78.4 mg, 0.228 mmol) in toluene (3 mL) was added to a solution of **1** (198.9 mg, 0.209 mmol) in toluene (3 mL) at -30 °C. The mixture was stirred at room temperature for a few minutes, and filtered through a celite pad to remove the precipitate of AgBr formed in the system. The filtrate was concentrated under reduced pressure to afford a dark red solid of **2a** (224.6 mg, 0.203 mmol, 97%). Single crystals suitable for X-ray diffraction analysis were obtained by allowing to stand the saturated toluene solution at room temperature for 8 days. <sup>1</sup>H NMR (CD<sub>2</sub>Cl<sub>2</sub>, 20 °C): δ 1.33 (18H, s), 1.57 (36H, s), 6.68 (4H, d, *J* = 6.8 Hz), 7.12 (4H, t, *J* = 7.6 Hz), 7.24 (4H, m), 7.39 (4H, s), 7.70 (1H, s). <sup>13</sup>C{<sup>1</sup>H} NMR (CD<sub>2</sub>Cl<sub>2</sub>, 20 °C): δ 31.5, 34.6, 35.6, 39.2, 123.7, 125.8, 128.4, 128.7, 129.5, 130.0, 137.0, 138.3, 153.7, 156.6, 157.1. The <sup>13</sup>C NMR signal of P=C was obscure due to low signal intensity. <sup>31</sup>P{<sup>1</sup>H} NMR (CD<sub>2</sub>Cl<sub>2</sub>, 20 °C): δ 213.3 (br). IR (KBr, cm<sup>-1</sup>): 655, 461 (ν(SbF<sub>6</sub>)). Anal. Found: C, 59.37; H, 6.60; N, 1.14. Calcd for C<sub>55</sub>H<sub>71</sub>CuF<sub>6</sub>NP<sub>2</sub>Sb: C, 59.65; H, 6.46; N, 1.26.

**Preparation of [Cu(PF<sub>6</sub>)(BPEP)] (2b).** Complex **2b** was similarly prepared from **1** (19.5 mg, 2.1 μmol) and AgPF<sub>6</sub> (4.8 mg, 2.2 μmol) in 71% yield (15.0 mg, 1.5 μmol). Because a part of **2b** was converted to **6** in the concentrated solution during isolation, elementary analysis was not performed. The <sup>1</sup>H and <sup>13</sup>C NMR data in CD<sub>2</sub>Cl<sub>2</sub> were identical to those of **2a**. <sup>31</sup>P{<sup>1</sup>H} NMR (CD<sub>2</sub>Cl<sub>2</sub>, 20 °C): δ -143.9 (sep, <sup>1</sup>*J*<sub>PF</sub> = 711 Hz, PF<sub>6</sub><sup>-</sup>), 213.3 (br). <sup>19</sup>F NMR (CD<sub>2</sub>Cl<sub>2</sub>, 20 °C): δ -73.55 (d, <sup>1</sup>*J*<sub>PF</sub> = 711 Hz, PF<sub>6</sub><sup>-</sup>). IR (KBr, cm<sup>-1</sup>): 844, 607 (ν(PF<sub>6</sub><sup>-</sup>)).

**Preparation of [Cu(MeCN)(BPEP)]<sup>+</sup>SbF<sub>6</sub><sup>-</sup> (3).** Complex **2a** (10.8 mg, 9.8 μmol), freshly prepared from **1** and AgSbF<sub>6</sub> in toluene, was dissolved in CD<sub>2</sub>Cl<sub>2</sub> (0.4 mL) in an NMR sample tube, and MeCN (0.5 μL, 19.5 μmol) was added. <sup>1</sup>H NMR analysis revealed quantitative formation of **3**. The solution was concentrated under reduced pressure, layered with hexane, and allowed to stand at room temperature to afford red crystals of **3**, containing toluene as a crystal solvent (6.3 mg, 5.5 μmol, 56%). The NMR data for the cationic part are as follows. <sup>1</sup>H NMR (CD<sub>2</sub>Cl<sub>2</sub>, 20 °C): δ 1.35 (18H, s), 1.47 (36H, s), 2.26 (3H, s), 6.65 (4H, d, *J* = 7.6 Hz), 7.10 (4H, t, *J* = 8.0 Hz), 7.17–7.26 (4H, m), 7.36 (4H, s), 7.63 (1H, t, *J* = 8.0 Hz). <sup>13</sup>C{<sup>1</sup>H} NMR (CD<sub>2</sub>Cl<sub>2</sub>, 20 °C): δ 1.5 (CH<sub>3</sub>CN), 31.6, 34.6, 35.7, 39.2, 121.2 (CH<sub>3</sub>CN), 123.6, 123.8, 126.2, 128.5, 128.7, 129.7, 138.1, 138.7, 154.3, 156.9, 157.2, 176.6. <sup>31</sup>P{<sup>1</sup>H} NMR (CD<sub>2</sub>Cl<sub>2</sub>, 20 °C): δ 251.1 (br). Anal. Found: C, 61.80; H, 6.77; N, 2.32. Calcd for C<sub>57</sub>H<sub>74</sub>CuF<sub>6</sub>N<sub>2</sub>P<sub>2</sub>Sb•0.5C<sub>7</sub>H<sub>8</sub>: C, 60.81; H, 6.58; N, 2.35.

**Preparation of [Cu(CO)(BPEP)]<sup>+</sup>SbF<sub>6</sub><sup>-</sup> (4).** Complex **2a** (17.8 mg, 16.1 μmol) was dissolved in CH<sub>2</sub>Cl<sub>2</sub> (1 mL), and degassed at –196 °C. Atmospheric pressure of CO was introduced from a balloon. The color of the solution immediately turned light orange. Hexane (ca. 1 mL) was slowly layered, and the mixture was allowed to stand at –5 °C overnight, giving orange crystals of **4**, which contains CH<sub>2</sub>Cl<sub>2</sub> as a crystal solvent (5.49 mg, 4.8 μmol, 30%). The NMR data for the cationic part are as follows. <sup>1</sup>H NMR (CD<sub>2</sub>Cl<sub>2</sub>, 20 °C): δ 1.34 (18H, s), 1.55 (36H, s), 6.72 (4H, d, *J* = 7.6 Hz), 7.12 (4H, t, *J* = 8.0 Hz), 7.22–7.28 (4H, m), 7.39 (4H, s), 7.71 (1H, t, *J* = 8.0 Hz). <sup>13</sup>C{<sup>1</sup>H} NMR (CD<sub>2</sub>Cl<sub>2</sub>, 20 °C): δ 31.5, 34.7, 35.7, 39.2, 123.9, 124.0, 124.8, 128.7, 129.3, 129.5, 137.2, 140.1, 155.1, 157.4, 157.9, 178.5. The <sup>13</sup>C NMR signal of CO was obscure due to quadrupole couplings with Cu. <sup>31</sup>P{<sup>1</sup>H} NMR (CD<sub>2</sub>Cl<sub>2</sub>, 20 °C): δ 227.3 (br). IR (KBr, cm<sup>-1</sup>): 2131 (ν(CO)). Anal. Found: C, 55.68; H, 6.02; N, 1.16. Calcd for C<sub>56</sub>H<sub>71</sub>CuF<sub>6</sub>NOP<sub>2</sub>Sb•CH<sub>2</sub>Cl<sub>2</sub>: C, 56.08; H, 6.03; N, 1.15.

**Preparation of [Cu(<sup>t</sup>BuNC)(BPEP)]<sup>+</sup>SbF<sub>6</sub><sup>-</sup> (5).** Complex **2a** (10.3 mg, 9.3 μmol) was dissolved in CD<sub>2</sub>Cl<sub>2</sub> (0.6 mL), and <sup>t</sup>BuNC (1.1 μL, 9.9 μmol) was added at room temperature. The color of the solution immediately turned light red, and the NMR spectroscopy showed complete conversion of **2a** to **5**. All the volatiles were removed under vacuum, and the residue was washed with hexane and dried (10.2 mg, 8.6 μmol, 92%). <sup>1</sup>H NMR (CD<sub>2</sub>Cl<sub>2</sub>, 20 °C): δ 1.34 (18H, s), 1.47 (36H, s), 1.49 (9H, s, <sup>t</sup>BuNC), 6.61 (4H, brs), 7.07, 7.17, 7.30, 7.35 (totally 12H, brs), 7.67 (1H, brs). <sup>13</sup>C{<sup>1</sup>H} NMR (CD<sub>2</sub>Cl<sub>2</sub>, 20 °C): δ 29.9 (<sup>t</sup>BuNC), 30.9, 34.2, 35.0, 38.6, 58.7 (<sup>t</sup>BuNC), 123.1, 123.3, 126.0, 127.9, 128.1, 129.3, 137.2, 137.6, 153.9, 156.2, 156.9, 174.8. The <sup>13</sup>C NMR signal of <sup>t</sup>BuNC was obscure due to quadrupole couplings with Cu. <sup>31</sup>P{<sup>1</sup>H} NMR (CD<sub>2</sub>Cl<sub>2</sub>, 20 °C): δ 261.5 (br). IR (KBr, cm<sup>-1</sup>): 2198 (ν(CN)). Anal. Found: C, 60.61; H, 6.81; N, 2.39. Calcd for C<sub>60</sub>H<sub>80</sub>CuF<sub>6</sub>NP<sub>2</sub>Sb: C, 60.53; H, 6.77; N, 2.35.

**Preparation of [Cu<sub>2</sub>(μ-PF<sub>6</sub>)(BPEP)<sub>2</sub>]<sup>+</sup>PF<sub>6</sub><sup>-</sup> (6).** A solution **2b** (16.4 mg, 16.1 μmol) in toluene (1 mL) was allowed to stand at room temperature for 2 days, to afford dark red crystals of **6**, which was washed with toluene and dried under vacuum (10.1 mg, 0.00497 mmol, 62%). <sup>1</sup>H NMR (CD<sub>2</sub>Cl<sub>2</sub>, 20 °C): δ 1.32 (36H, s), 1.45 (72H, s), 6.67 (8H, d, *J* = 7.6 Hz), 7.08 (8H, t, *J* = 8.0 Hz), 7.20 (8H, m), 7.35 (8H, s), 7.61 (2H, t, *J* = 7.6 Hz). <sup>13</sup>C{<sup>1</sup>H} NMR (CD<sub>2</sub>Cl<sub>2</sub>, 20 °C): δ 30.9, 34.0, 35.0, 38.6, 123.2, 123.7, 124.9, 127.9, 128.3, 129.1, 137.4, 137.6, 153.5, 156.2 (2C), 175.5. <sup>31</sup>P{<sup>1</sup>H} NMR (CD<sub>2</sub>Cl<sub>2</sub>, 20 °C): δ –143.9 (sep, <sup>1</sup>*J*<sub>PF</sub> = 711 Hz, PF<sub>6</sub><sup>-</sup>), –17.3 (t, <sup>1</sup>*J*<sub>PF</sub> = 978 Hz, μ-PF<sub>6</sub>), 244.7 (br, BPEP). <sup>19</sup>F NMR (CD<sub>2</sub>Cl<sub>2</sub>, 20 °C): δ –77.8 (d, <sup>1</sup>*J*<sub>PF</sub> = 978 Hz, μ-PF<sub>6</sub>), –73.7 (d, <sup>1</sup>*J*<sub>PF</sub> = 711 Hz, PF<sub>6</sub><sup>-</sup>). Anal. Found: C, 65.27; H, 7.04; N, 1.39. Calcd for C<sub>110</sub>H<sub>142</sub>Cu<sub>2</sub>F<sub>12</sub>N<sub>2</sub>P<sub>6</sub>: C, 64.98; H, 7.04; N, 1.38. IR (KBr,

$\text{cm}^{-1}$ ): 876 ( $\nu(\mu\text{-PF}_6^-)$ ), 843 ( $\nu(\text{PF}_6^-)$ ), 808 ( $\nu(\mu\text{-PF}_6^-)$ ), 557 ( $\nu(\text{PF}_6^-)$ ).

**Reaction of 2a with  $\text{Me}_3\text{SiN}_3$  to give  $[\text{Cu}_2(\mu\text{-N}_3)(\text{BPEP})_2]^+\text{SbF}_6^-$  (**7a**).** Complex **2a** (6.8 mg, 6.2  $\mu\text{mol}$ ) and mesitylene (1.3 mg, 11  $\mu\text{mol}$ ) as an internal standard were placed in an NMR sample tube, and dissolved in  $\text{CD}_2\text{Cl}_2$  (0.6 mL) at room temperature.  $\text{Me}_3\text{SiN}_3$  (0.9 mg, 7.8  $\mu\text{mol}$ ) was added, and the mixture was heated at 50 °C for 14 h.  $^1\text{H}$  NMR analysis revealed the absence of **2a** and the formation of  $\text{Me}_3\text{SiF}$  (3.3  $\mu\text{mol}$ ). The mixture was concentrated to dryness, and the residue was washed with hexane and dried under vacuum to give a dark red solid of **7a** (6.2 mg, 3.0  $\mu\text{mol}$ , 97%). The crude product was dissolved in toluene and allowed to stand at  $-30$  °C to give single crystals suitable for X-ray diffraction analysis.  $^1\text{H}$  NMR ( $\text{CD}_2\text{Cl}_2$ , 20 °C):  $\delta$  1.33 (36H, s), 1.41 (72H, s), 6.61 (8H, d,  $J = 7.2$  Hz), 7.07 (8H, t,  $J = 8.0$  Hz), 7.15-7.24 (8H, m), 7.30 (8H, s), 7.60 (2H, t,  $J = 8.0$  Hz).  $^{13}\text{C}\{^1\text{H}\}$  NMR ( $\text{CD}_2\text{Cl}_2$ , 20 °C):  $\delta$  31.5, 34.2, 35.6, 38.9, 123.2, 123.5, 128.2, 128.3, 129.5, 129.7, 137.6, 138.2, 153.8, 156.4, 156.9, 174.8.  $^{31}\text{P}\{^1\text{H}\}$  NMR ( $\text{CD}_2\text{Cl}_2$ , 20 °C):  $\delta$  255.7 (br). IR (KBr,  $\text{cm}^{-1}$ ): 2130 ( $\nu(\text{N}_3)$ ). Anal. Found: C, 65.04; H, 7.06; N, 3.57. Calcd for  $\text{C}_{110}\text{H}_{142}\text{Cu}_2\text{F}_6\text{N}_5\text{P}_4\text{Sb}$ : C, 65.37; H, 7.08; N, 3.47.

**Reaction of 2b with  $\text{Me}_3\text{SiN}_3$  to give  $[\text{Cu}_2(\mu\text{-N}_3)(\text{BPEP})_2]^+\text{PF}_6^-$  (**7b**).** Complex **2b** was freshly prepared from **1** (18.6 mg, 0.020 mmol) and  $\text{AgPF}_6$  (5.5 mg, 0.022 mmol) in toluene. To a concentrated toluene solution of **2b**,  $\text{Me}_3\text{SiN}_3$  (1.0 mg, 8.7  $\mu\text{mol}$ ) was added at room temperature. After the solution was heated at 50 °C for 2 h, the solvent was removed under vacuum. The residue was dissolved in toluene (0.2 mL) and allowed to stand at  $-30$  °C to give **7b** (7.0 mg, 0.0036 mmol, 36%) as red crystals. The  $^1\text{H}$  and  $^{13}\text{C}$  data in  $\text{CD}_2\text{Cl}_2$  were identical to those of **7a**.  $^{31}\text{P}\{^1\text{H}\}$  NMR ( $\text{CD}_2\text{Cl}_2$ , 20 °C):  $\delta$   $-143.9$  (sep,  $^1J_{\text{PF}} = 711$  Hz,  $\text{PF}_6^-$ ), 255.7 (br, BPEP).  $^{19}\text{F}$  NMR ( $\text{CD}_2\text{Cl}_2$ , 20 °C):  $\delta$   $-73.80$  (d,  $^1J_{\text{PF}} = 711$  Hz,  $\text{PF}_6^-$ ). IR (KBr,  $\text{cm}^{-1}$ ): 2123 ( $\nu(\text{N}_3)$ ). Anal. Found: C, 68.22; H, 7.51; N, 3.92. Calcd for  $\text{C}_{110}\text{H}_{142}\text{Cu}_2\text{F}_6\text{N}_5\text{P}_3$ : C, 68.45; H, 7.41; N, 3.63.

**X-Ray crystal structure determination.** The intensity data were collected on a Rigaku Mercury CCD diffractometer for **2a**, **3**, **4** and **7a**, and on a Rigaku VariMax diffractometer for **1** and **6** with graphite-monochromated Mo  $K\alpha$  radiation ( $\lambda = 0.71070$  Å). The frame data were integrated using the CrystalClear program package. The data sets were corrected for Lorentz and polarization effects and absorption. The structures were solved by direct method (SHELXS-97<sup>2</sup>) and refined on  $F^2$  for all reflections (SHELXL-97).<sup>3</sup> In the structure of **1**, two  $t\text{Bu}$  groups and  $\text{CH}_2\text{Cl}_2$  were disordered. In the structure of **2a**, one  $t\text{Bu}$  group and one fluorine atom of the  $\text{SbF}_6^-$  unit were disordered. In the structure of **3**, three  $t\text{Bu}$  groups were disordered. In the structure of **4**, two  $t\text{Bu}$  groups,  $\text{SbF}_6^-$  and incorporated  $\text{CH}_2\text{Cl}_2$  were disordered. In the structure of **6**, three  $t\text{Bu}$  groups were disordered. Anisotropic refinement was applied to all non-hydrogen atoms except for disordered groups. Hydrogen atoms were placed at calculated positions. The structure of **7a** could not be fully characterized because of poor data sets, while the dinuclear structure was confirmed. The crystallographic data and the summary of solution and refinement are listed in Table S1. The molecular structures and selected structural data are given in Figures S1–S6 and Tables S2–S6. Further information has been deposited with the Cambridge Crystallographic Data Center. CCDC reference numbers: 812261 (**1**), 812262 (**2a**), 812263 (**3**), 812264 (**4**), 812265 (**6**).

**Table S1** Crystallographic data for **1**, **2a**, **3**, **4**, **6**, and **7a**

| Compound                                     | <b>1</b>                                                                                 | <b>2a</b>                                                           | <b>3</b>                                                                                                             | <b>4</b>                                                                                | <b>6</b>                                                         | <b>7a</b>                                                                                         |
|----------------------------------------------|------------------------------------------------------------------------------------------|---------------------------------------------------------------------|----------------------------------------------------------------------------------------------------------------------|-----------------------------------------------------------------------------------------|------------------------------------------------------------------|---------------------------------------------------------------------------------------------------|
| Empirical formula                            | C <sub>55</sub> H <sub>71</sub> BrCuNP <sub>2</sub> · 0.5CH <sub>2</sub> Cl <sub>2</sub> | C <sub>55</sub> H <sub>71</sub> CuF <sub>6</sub> NP <sub>2</sub> Sb | C <sub>64</sub> H <sub>82</sub> CuF <sub>6</sub> N <sub>2</sub> P <sub>2</sub> Sb · 0.5C <sub>7</sub> H <sub>8</sub> | C <sub>57</sub> H <sub>71</sub> CuF <sub>6</sub> NOSb · CH <sub>2</sub> Cl <sub>2</sub> | C <sub>55</sub> H <sub>71</sub> CuF <sub>6</sub> NP <sub>3</sub> | C <sub>110</sub> H <sub>142</sub> Cu <sub>2</sub> F <sub>6</sub> N <sub>5</sub> P <sub>4</sub> Sb |
| Fw                                           | 993.98                                                                                   | 1107.36                                                             | 1286.61                                                                                                              | 1220.29                                                                                 | 1016.58                                                          | 2021.00                                                                                           |
| Crystal system                               | Monoclinic                                                                               | Monoclinic                                                          | Triclinic                                                                                                            | Monoclinic                                                                              | Triclinic                                                        | Triclinic                                                                                         |
| space group                                  | <i>P</i> <sub>2</sub> / <i>c</i>                                                         | <i>P</i> <sub>2</sub> / <i>c</i>                                    | <i>P</i> (-1)                                                                                                        | <i>P</i> <sub>2</sub> / <i>a</i>                                                        | <i>P</i> (-1)                                                    | <i>P</i> <sub>2</sub> / <i>c</i>                                                                  |
| <i>a</i> (Å)                                 | 15.9441(2)                                                                               | 11.715(2)                                                           | 12.075(3)                                                                                                            | 18.330(7)                                                                               | 11.5918(16)                                                      | 18.68(6)                                                                                          |
| <i>b</i> (Å)                                 | 9.64940(2)                                                                               | 24.683(5)                                                           | 17.639(4)                                                                                                            | 18.284(6)                                                                               | 13.059(2)                                                        | 19.13(3)                                                                                          |
| <i>c</i> (Å)                                 | 35.0720(7)                                                                               | 19.400(4)                                                           | 17.853(4)                                                                                                            | 18.673(7)                                                                               | 19.304(3)                                                        | 19.42(3)                                                                                          |
| <i>α</i> (deg)                               |                                                                                          | 90.00                                                               | 111.242(3)                                                                                                           | 90.00                                                                                   | 71.143(3)                                                        | 103.09(6)                                                                                         |
| <i>β</i> (deg)                               | 96.2821(8)                                                                               | 106.209(3)                                                          | 101.392(2)                                                                                                           | 110.230(4)                                                                              | 73.149(8)                                                        | 115.06(7)                                                                                         |
| <i>γ</i> (deg)                               |                                                                                          | 90.00                                                               | 105.3822(15)                                                                                                         | 90.00                                                                                   | 76.891(8)                                                        | 109.46(6)                                                                                         |
| <i>V</i> (Å <sup>3</sup> )                   | 5363.46(14)                                                                              | 5386.7(18)                                                          | 3229.7(13)                                                                                                           | 5872(3)                                                                                 | 2618.0(7)                                                        | 5352(19)                                                                                          |
| <i>Z</i>                                     | 4                                                                                        | 4                                                                   | 2                                                                                                                    | 4                                                                                       | 2                                                                | 2                                                                                                 |
| <i>μ</i> (Mo <i>Kα</i> ) (mm <sup>-1</sup> ) | 1.296                                                                                    | 1.012                                                               | 0.854                                                                                                                | 1.024                                                                                   | 0.566                                                            | 0.762                                                                                             |
| temp (K)                                     | 103(2)                                                                                   | 173(2)                                                              | 173(2)                                                                                                               | 173(2)                                                                                  | 103(2)                                                           | 173(2)                                                                                            |
| reflections collected                        | 52478                                                                                    | 51160                                                               | 31379                                                                                                                | 47440                                                                                   | 21606                                                            | 51425                                                                                             |
| unique reflections                           | 9450                                                                                     | 16150                                                               | 17862                                                                                                                | 13047                                                                                   | 11509                                                            | 29651                                                                                             |
|                                              | ( <i>R</i> <sub>int</sub> = 0.0715)                                                      | ( <i>R</i> <sub>int</sub> = 0.0565)                                 | ( <i>R</i> <sub>int</sub> = 0.0391)                                                                                  | ( <i>R</i> <sub>int</sub> = 0.0557)                                                     | ( <i>R</i> <sub>int</sub> = 0.0331)                              | ( <i>R</i> <sub>int</sub> = 0.1245)                                                               |
| GOF                                          | 1.232                                                                                    | 1.396                                                               | 1.137                                                                                                                | 1.991                                                                                   | 1.284                                                            | 1.315                                                                                             |
| final <i>R</i> indices                       | <i>R</i> <sub>1</sub> = 0.0818                                                           | <i>R</i> <sub>1</sub> = 0.0875                                      | <i>R</i> <sub>1</sub> = 0.0836                                                                                       | <i>R</i> <sub>1</sub> = 0.1005                                                          | <i>R</i> <sub>1</sub> = 0.0719                                   | <i>R</i> <sub>1</sub> = 0.1973                                                                    |
| ( <i>I</i> > 2σ( <i>I</i> ))                 | <i>wR</i> <sub>2</sub> = 0.1827                                                          | <i>wR</i> <sub>2</sub> = 0.2267                                     | <i>wR</i> <sub>2</sub> = 0.1853                                                                                      | <i>wR</i> <sub>2</sub> = 0.3153                                                         | <i>wR</i> <sub>2</sub> = 0.1985                                  | <i>wR</i> <sub>2</sub> = 0.3534                                                                   |
| <i>R</i> indices                             | <i>R</i> <sub>1</sub> = 0.0969                                                           | <i>R</i> <sub>1</sub> = 0.1036                                      | <i>R</i> <sub>1</sub> = 0.1073                                                                                       | <i>R</i> <sub>1</sub> = 0.1099                                                          | <i>R</i> <sub>1</sub> = 0.0848                                   | <i>R</i> <sub>1</sub> = 0.3180                                                                    |
| (all data)                                   | <i>wR</i> <sub>2</sub> = 0.1902                                                          | <i>wR</i> <sub>2</sub> = 0.2270                                     | <i>wR</i> <sub>2</sub> = 0.2025                                                                                      | <i>wR</i> <sub>2</sub> = 0.3193                                                         | <i>wR</i> <sub>2</sub> = 0.2095                                  | <i>wR</i> <sub>2</sub> = 0.4191                                                                   |

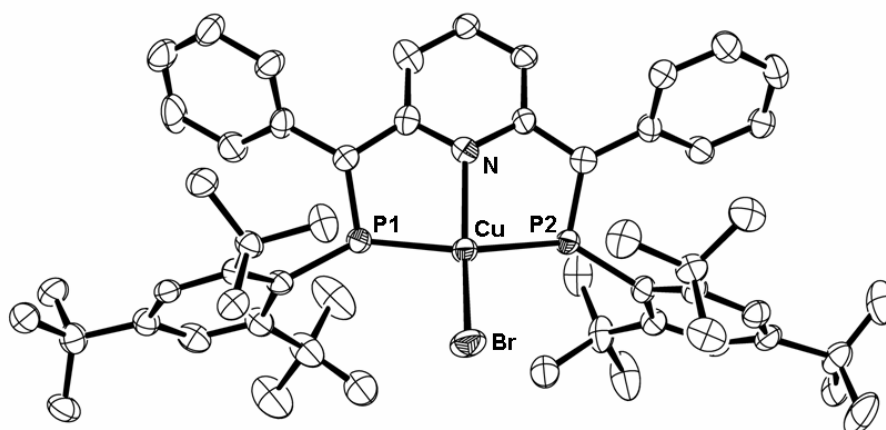

**Fig. S1** ORTEP drawing of **1** with 50% probability ellipsoids. Hydrogen atoms, disordered *tert*-butyl groups, and an incorporated CH<sub>2</sub>Cl<sub>2</sub> molecule were omitted for clarity.

**Table S2** Selected bond lengths (Å) and angles (deg) for **1**

|       |            |           |            |
|-------|------------|-----------|------------|
| Cu-N  | 2.070(5)   | N-Cu-Br   | 152.32(14) |
| Cu-P1 | 2.2390(19) | N-Cu-P1   | 82.34(15)  |
| Cu-P2 | 2.2396(18) | N-Cu-P2   | 81.83(15)  |
| Cu-Br | 2.3381(11) | P1-Cu-P2  | 143.84(7)  |
|       |            | P1-Cu -Br | 105.06(6)  |
|       |            | P2-Cu-Br  | 104.03(6)  |

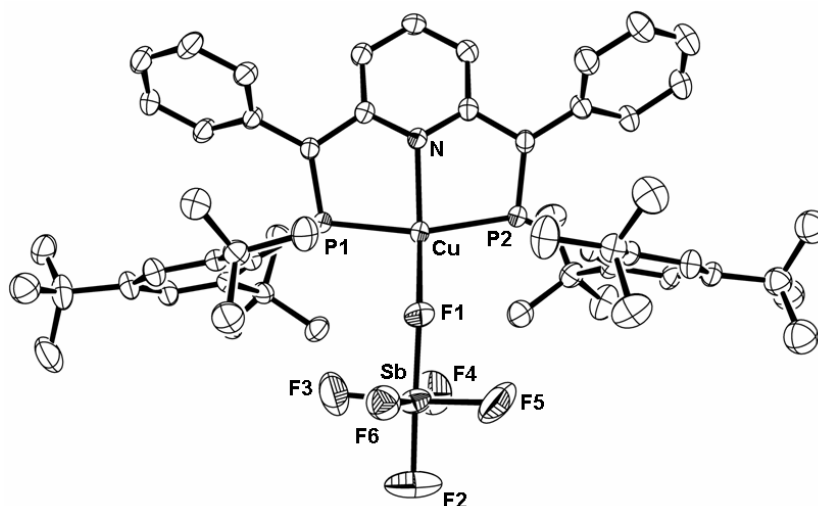

**Fig. S2** ORTEP drawing of **2a** with 50% probability ellipsoids. Hydrogen atoms, disordered *tert*-butyl groups, and disordered F6 atom were omitted for clarity.

**Table S3** Selected bond lengths (Å) and angles (deg) for **2a**

|       |            |          |            |
|-------|------------|----------|------------|
| Cu-N  | 2.107(3)   | N-Cu-F1  | 146.05(15) |
| Cu-P1 | 2.2526(11) | N-Cu-P1  | 82.98(9)   |
| Cu-P2 | 2.2612(11) | N-Cu-P2  | 82.32(9)   |
| Cu-F1 | 2.190(3)   | P1-Cu-P2 | 156.25(5)  |
| Sb-F1 | 1.916(3)   | Cu-F1-Sb | 143.9(2)   |
| Sb-F2 | 1.843(4)   | P1-Cu-F1 | 100.63(10) |
| Sb-F3 | 1.859(5)   | P2-Cu-F2 | 101.99(10) |
| Sb-F4 | 1.846(4)   |          |            |
| Sb-F5 | 1.850(5)   |          |            |

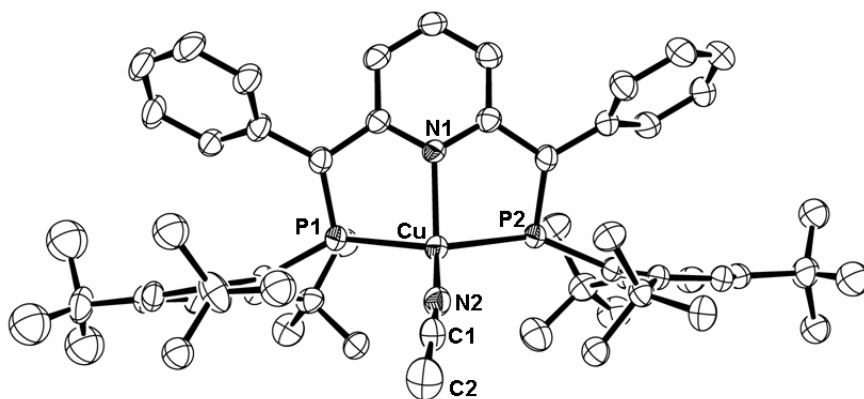

**Fig. S3** ORTEP drawing of **3** with 50% probability ellipsoids. Hydrogen atoms, disordered *tert*-butyl groups, an incorporated toluene molecule, and a free  $\text{SbF}_6$  anion were omitted for clarity.

**Table S4** Selected bond lengths (Å) and angles (deg) for **3**

|       |            |          |            |
|-------|------------|----------|------------|
| Cu-N1 | 2.059(3)   | N1-Cu-N2 | 131.57(16) |
| Cu-P1 | 2.2828(12) | N2-Cu-P1 | 81.32(10)  |
| Cu-P2 | 2.2900(12) | N2-Cu-P2 | 82.45(10)  |
| Cu-N2 | 1.928(4)   | P1-Cu-P2 | 137.65(5)  |
| N2-C1 | 1.138(6)   | Cu-N2-C1 | 174.8(4)   |
| C1-C2 | 1.460(7)   | N2-C1-C2 | 178.2(5)   |
|       |            | P1-Cu-N2 | 108.87(12) |
|       |            | P2-Cu-N2 | 111.17(12) |

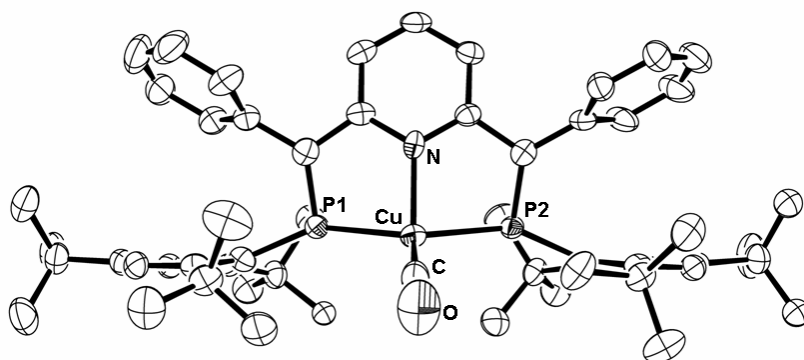

**Fig. S4** ORTEP drawing of **4** with 50% probability ellipsoids. Hydrogen atoms, disordered *tert*-butyl groups, an incorporated  $\text{CH}_2\text{Cl}_2$  molecule, and a free  $\text{SbF}_6$  anion were omitted for clarity.



**Table S5** Selected bond lengths (Å) and angles (deg) for **4**

|       |            |          |           |
|-------|------------|----------|-----------|
| Cu-N  | 2.007(6)   | N-Cu-C   | 128.0(3)  |
| Cu-P1 | 2.3164(18) | N-Cu-P1  | 81.96(15) |
| Cu-P2 | 2.3272(18) | N-Cu-P2  | 81.78(14) |
| Cu-C  | 1.857(9)   | P1-Cu-P2 | 135.33(7) |
| C-O   | 1.121(11)  | Cu-C-O   | 176.3(9)  |
|       |            | P1-Cu-C  | 113.9(2)  |
|       |            | P2-Cu-C  | 108.9(2)  |

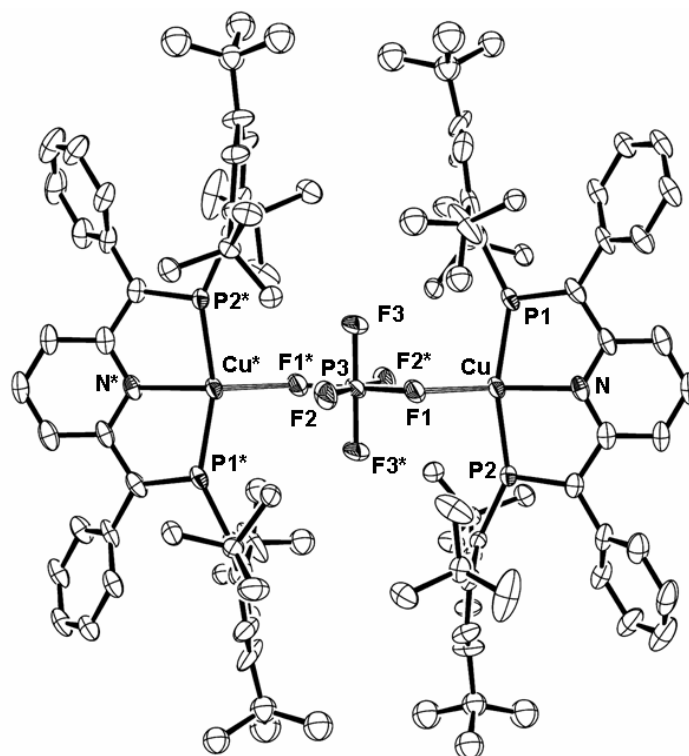

**Fig. S5** ORTEP drawing of **6** with 50% probability ellipsoids. Hydrogen atoms, disordered *tert*-butyl groups, and a free PF<sub>6</sub><sup>-</sup> anion were omitted for clarity.

**Table S6** Selected bond lengths (Å) and angles (deg) for **6**

|                                                |            |          |            |
|------------------------------------------------|------------|----------|------------|
| Cu-N                                           | 2.097(3)   | N-Cu-F1  | 144.32(9)  |
| Cu-P1                                          | 2.2613(10) | N-Cu-P1  | 82.90(8)   |
| Cu-P2                                          | 2.2638(9)  | N-Cu-P2  | 83.39(8)   |
| Cu-F1                                          | 2.241(2)   | P1-Cu-P2 | 157.34(4)  |
| P3-F1                                          | 1.637(2)   | Cu-F1-P3 | 128.95(13) |
| P3-F2                                          | 1.586(2)   | P1-Cu-F1 | 102.98(6)  |
| P3-F3                                          | 1.588(2)   | P2-Cu-F1 | 98.69(6)   |
| P-F of free PF <sub>6</sub> <sup>-</sup> (av.) | 1.576(3)   |          |            |



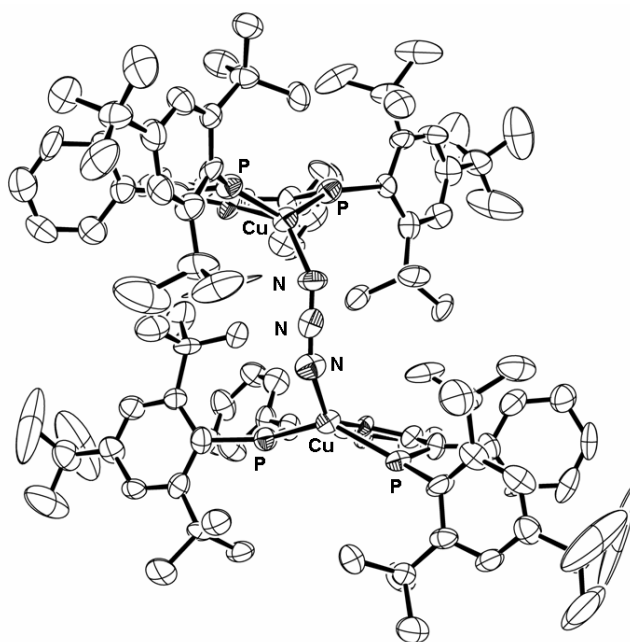

**Fig. S6** ORTEP drawing of **7a** with 50% probability ellipsoids. Hydrogen atoms and a free  $\text{SbF}_6^-$  anion were omitted for clarity.

**Computational Details.** Geometries optimization, energy, and NAO analysis were performed with DFT method, where the B3LYP functional was used. Optimization was performed with  $C_2$  symmetry in the structures. Full optimization without any structural constraints resulted in  $\mathbf{6}^{\text{FREE}}$ . This structure exhibited one small imaginary frequency ( $-15.86 \text{ i cm}^{-1}$ ), which breaks  $C_2$  symmetry of the molecule (Figure S9). The optimized geometry of  $\mathbf{6}'$ , in which the geometry of Cu-PF<sub>6</sub>-Cu core was fixed, exhibits four imaginary frequencies as a result of constraints (Figure S8). The structural optimization and NBO analysis employed the triple- $\zeta$  SDD basis set for copper, 6-31G(d) for P, N and F,<sup>4</sup> and 6-31G for C and H. Core electrons of Cu (up to 2p) were replaced with effective core potentials (ECPs).<sup>5</sup> The Gaussian 03 program package was used for all calculations.<sup>6</sup> Molecular orbitals were drawn with the GaussView 5.0 program package.

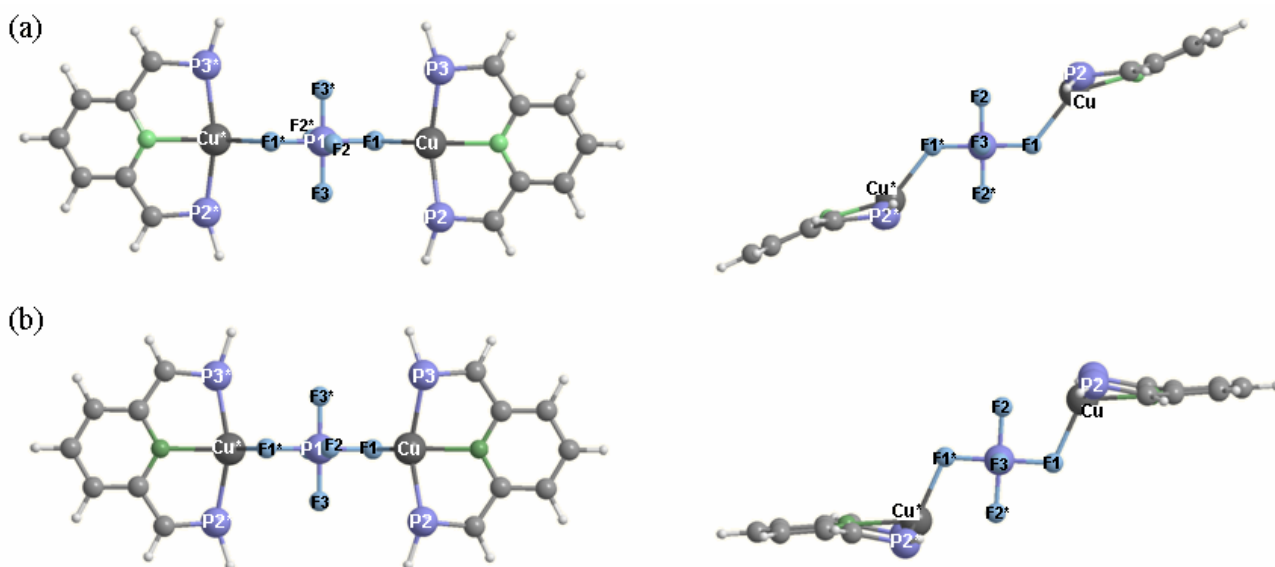

**Fig. S7** Optimized geometry of  $\mathbf{6}'$  (a) and  $\mathbf{6}^{\text{FREE}}$  (b)

**Table S7** Selected bond lengths and angles of **6'** and **6'<sup>FREE</sup>**

|          | <b>6'</b> | <b>6'<sup>FREE</sup></b> | <b>6 (X-ray)</b> |
|----------|-----------|--------------------------|------------------|
| Cu-P2    | 2.34      | 2.36                     | 2.2613(10)       |
| Cu-P3    | 2.34      | 2.36                     | 2.2638(9)        |
| Cu-N     | 2.12      | 2.14                     | 2.097(3)         |
| Cu-F1    | 2.24      | 2.16                     | 2.241(2)         |
| Cu-F2    | 3.05      | 2.48                     | 3.054            |
| P1-F1    | 1.64      | 1.67                     | 1.637(2)         |
| P1-F2    | 1.59      | 1.64                     | 1.586(2)         |
| P1-F3    | 1.59      | 1.62                     | 1.588(2)         |
| P2-Cu-P3 | 153.6     | 147.2                    | 157.34(4)        |
| N-Cu-F1  | 144.3     | 117.7                    | 144.32(9)        |
| Cu-F1-P1 | 129.0     | 111.45                   | 128.95(13)       |

**Table S8** Absolute total energies (in Hartree) of **6'** and **6'<sup>FREE</sup>**

|              | <b>6'</b>    | <b>6'<sup>FREE</sup></b> |
|--------------|--------------|--------------------------|
| Total energy | -3351.777350 | -3351.792734             |

**Table S9** Natural charge by NBO analysis

|                                 | <b>6'</b> | <b>6'<sup>FREE</sup></b> | <b>[Cu(BPEP)]<sup>+</sup></b> | <b>PF<sub>6</sub><sup>-</sup></b> |
|---------------------------------|-----------|--------------------------|-------------------------------|-----------------------------------|
| Cu                              | 0.78      | 0.79                     | 0.67                          |                                   |
| P2,3                            | 0.36      | 0.36                     | 0.36                          |                                   |
| N                               | -0.54     | -0.54                    | -0.54                         |                                   |
| P1                              | 2.78      | 2.74                     |                               | 2.65                              |
| F1                              | -0.61     | -0.60                    |                               | -0.61                             |
| F2                              | -0.60     | -0.59                    |                               | -0.61                             |
| F3                              | -0.60     | -0.59                    |                               | -0.61                             |
| Total charge of PF <sub>6</sub> | -0.84     | -0.82                    |                               | -1.00                             |

**Table S10** Mayer's bond order

|       | <b>6'</b> | <b>6'<sup>FREE</sup></b> |
|-------|-----------|--------------------------|
| Cu-F1 | 0.32      | 0.32                     |
| Cu-F2 | 0.13      | 0.23                     |
| Cu-F3 | 0.03      | 0.04                     |
| P1-F1 | 0.66      | 0.65                     |
| P1-F2 | 0.82      | 0.74                     |
| P1-F3 | 0.87      | 0.85                     |

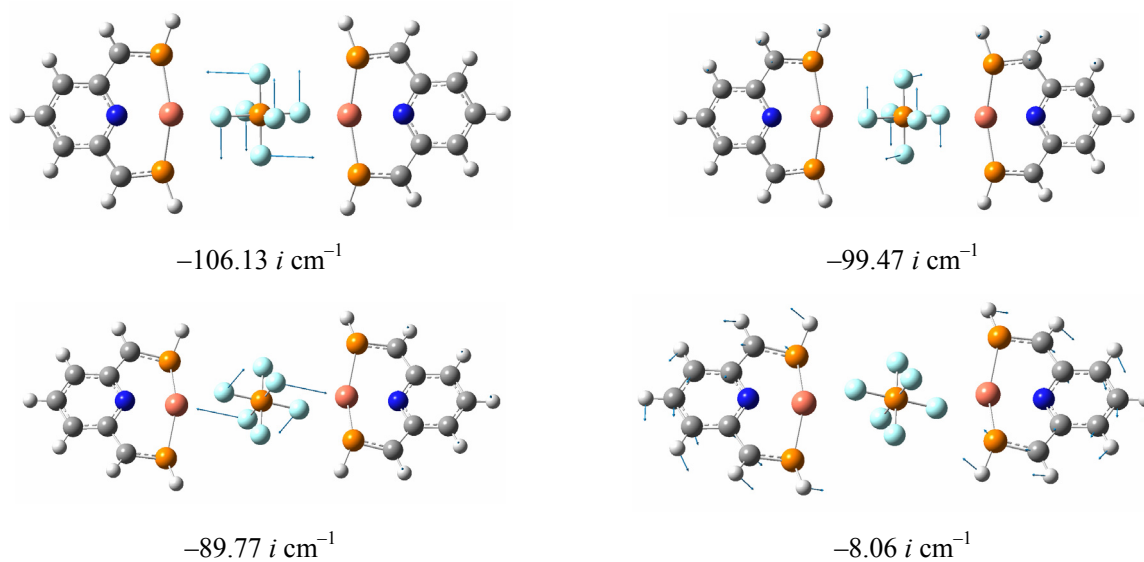

**Fig. S8** Imaginary frequency of  $6'$

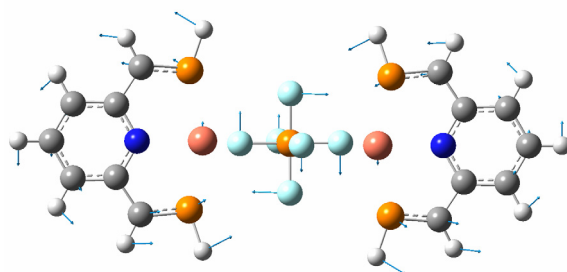

**Fig. S9** Imaginary frequency of  $6'^{\text{FREE}}$  ( $-15.86 i \text{ cm}^{-1}$ )

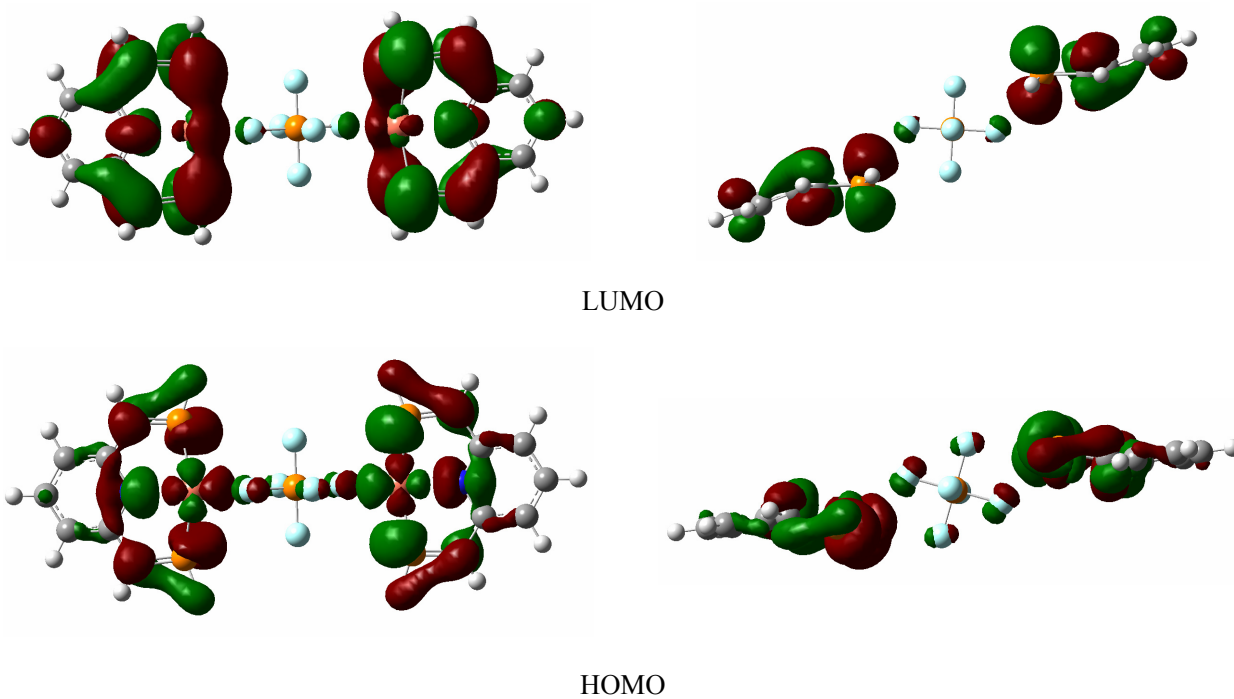

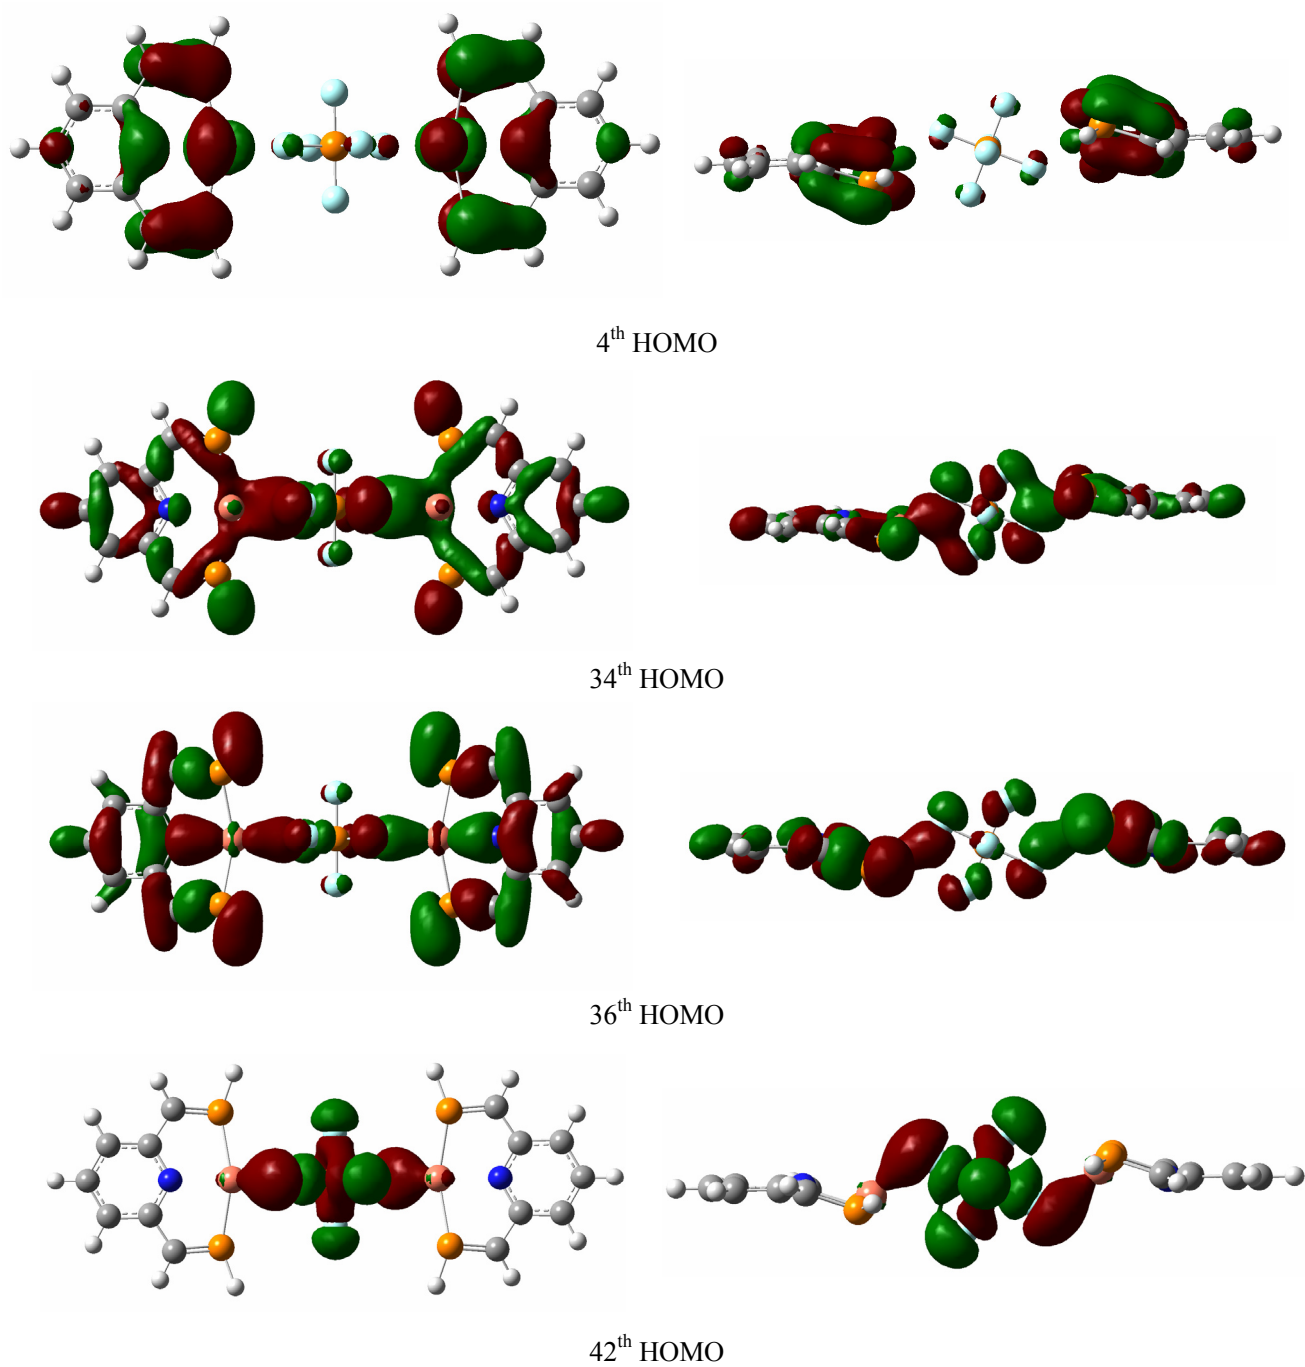

**Fig. S10** Selected Kohn-sham orbitals of **6'** including orbital overlaps between Cu and  $\text{PF}_6$

**Table S11** Cartesian coordinates of **6**<sup>+</sup>

|    |           |           |           |
|----|-----------|-----------|-----------|
| P  | 0.000000  | 0.000000  | 0.000000  |
| F  | 0.000000  | 0.000000  | 1.640000  |
| F  | 1.590000  | 0.000000  | 0.000000  |
| F  | 0.000000  | 1.590000  | 0.000000  |
| F  | 0.000000  | 0.000000  | -1.640000 |
| F  | -1.590000 | 0.000000  | 0.000000  |
| F  | 0.000000  | -1.590000 | 0.000000  |
| Cu | 1.739060  | 0.000000  | 3.048897  |
| P  | 2.238967  | 2.280067  | 3.237080  |
| P  | 2.238967  | -2.280067 | 3.237080  |
| N  | 2.296990  | 0.000000  | 5.091468  |
| C  | 2.621155  | 1.179326  | 5.691669  |
| C  | 3.196411  | 1.203392  | 6.976677  |
| H  | 3.418398  | 2.153568  | 7.447697  |
| C  | 3.432513  | 0.000000  | 7.642807  |
| H  | 3.871474  | 0.000000  | 8.633734  |
| C  | 2.621122  | -1.178647 | 5.691885  |
| C  | 3.141857  | -1.205482 | 6.999884  |
| H  | 3.364708  | -2.155694 | 7.470192  |
| C  | 2.383043  | 2.396430  | 4.918213  |
| H  | 2.364372  | 3.338599  | 5.457994  |
| C  | 2.383166  | -2.396051 | 4.918852  |
| H  | 2.364561  | -3.338029 | 5.458969  |
| H  | 1.862323  | 3.601890  | 2.889519  |
| H  | 1.862323  | -3.601890 | 2.889519  |
| Cu | -1.739060 | 0.000000  | -3.048897 |
| P  | -2.238967 | 2.280067  | -3.237080 |
| P  | -2.238967 | -2.280067 | -3.237080 |
| N  | -2.296990 | 0.000000  | -5.091468 |
| C  | -2.621155 | 1.179326  | -5.691669 |
| C  | -3.196411 | 1.203392  | -6.976677 |
| H  | -3.418398 | 2.153568  | -7.447697 |
| C  | -3.432513 | 0.000000  | -7.642807 |
| H  | -3.871474 | 0.000000  | -8.633734 |
| C  | -2.621122 | -1.178647 | -5.691885 |
| C  | -3.141857 | -1.205482 | -6.999884 |
| H  | -3.364708 | -2.155694 | -7.470192 |
| C  | -2.383043 | 2.396430  | -4.918213 |
| H  | -2.364372 | 3.338599  | -5.457994 |
| C  | -2.383166 | -2.396051 | -4.918852 |
| H  | -2.364561 | -3.338029 | -5.458969 |
| H  | -1.862323 | 3.601890  | -2.889519 |
| H  | -1.862323 | -3.601890 | -2.889519 |

**Table S12** Cartesian coordinates of **6**<sup>FREE</sup>

|    |           |           |           |
|----|-----------|-----------|-----------|
| Cu | 0.037917  | -0.001670 | 0.085104  |
| P  | -0.564390 | -2.263293 | 0.361203  |
| P  | -0.566588 | 2.257370  | 0.374274  |
| N  | -1.787564 | 0.000822  | -1.033471 |
| C  | -2.396860 | -1.176978 | -1.330855 |
| C  | -3.608991 | -1.203083 | -2.048034 |
| H  | -4.064329 | -2.153008 | -2.301563 |
| C  | -4.209987 | 0.002544  | -2.414893 |
| H  | -5.138198 | 0.003274  | -2.974523 |
| C  | -2.400069 | 1.178958  | -1.321861 |
| C  | -3.612912 | 1.207277  | -2.037841 |
| H  | -4.071263 | 2.157803  | -2.283488 |
| C  | -1.740001 | -2.389965 | -0.849751 |

|    |           |           |           |
|----|-----------|-----------|-----------|
| H  | -2.075807 | -3.338121 | -1.258901 |
| C  | -1.746186 | 2.390307  | -0.832034 |
| H  | -2.085765 | 3.340722  | -1.232814 |
| H  | -0.093643 | -3.600235 | 0.421082  |
| H  | -0.102089 | 3.595870  | 0.447174  |
| P  | 3.217700  | -0.001306 | 0.000000  |
| F  | 1.894186  | -0.001592 | -1.023535 |
| F  | 4.227054  | -0.001551 | -1.291402 |
| F  | 3.217700  | 1.614207  | 0.000000  |
| F  | 4.541214  | -0.001592 | 1.023535  |
| F  | 2.208346  | -0.001551 | 1.291402  |
| F  | 3.217700  | -1.616874 | 0.000000  |
| Cu | 6.397483  | -0.001670 | -0.085104 |
| P  | 6.999790  | -2.263293 | -0.361203 |
| P  | 7.001988  | 2.257370  | -0.374274 |
| N  | 8.222964  | 0.000822  | 1.033471  |
| C  | 8.832260  | -1.176978 | 1.330855  |
| C  | 10.044391 | -1.203083 | 2.048034  |
| H  | 10.499729 | -2.153008 | 2.301563  |
| C  | 10.645387 | 0.002544  | 2.414893  |
| H  | 11.573598 | 0.003274  | 2.974523  |
| C  | 8.835469  | 1.178958  | 1.321861  |
| C  | 10.048312 | 1.207277  | 2.037841  |
| H  | 10.506663 | 2.157803  | 2.283488  |
| C  | 8.175401  | -2.389965 | 0.849751  |
| H  | 8.511207  | -3.338121 | 1.258901  |
| C  | 8.181586  | 2.390307  | 0.832034  |
| H  | 8.521165  | 3.340722  | 1.232814  |
| H  | 6.529043  | -3.600235 | -0.421082 |
| H  | 6.537489  | 3.595870  | -0.447174 |

**Table S13** Cartesian coordinates of [Cu(BPEP)]<sup>+</sup>

|    |           |           |           |
|----|-----------|-----------|-----------|
| Cu | -0.007308 | 0.000000  | -0.002939 |
| N  | -0.473911 | 0.000000  | -2.137886 |
| P  | -0.087562 | 2.254069  | -0.325316 |
| P  | -0.087562 | -2.254069 | -0.325316 |
| C  | -0.621106 | 1.176528  | -2.785019 |
| C  | -0.621106 | -1.176528 | -2.785019 |
| C  | -0.440336 | 2.387385  | -1.968468 |
| C  | -0.930595 | 1.209544  | -4.157927 |
| C  | -0.440336 | -2.387385 | -1.968468 |
| C  | -0.930595 | -1.209544 | -4.157927 |
| C  | -1.085002 | 0.000000  | -4.842874 |
| H  | -0.546157 | 3.346989  | -2.466279 |
| H  | -0.546157 | -3.346989 | -2.466279 |
| H  | 0.017362  | 3.589959  | 0.118147  |
| H  | 0.017362  | -3.589959 | 0.118147  |
| H  | -1.046625 | 2.157685  | -4.669086 |
| H  | -1.046625 | -2.157685 | -4.669086 |
| H  | -1.324143 | 0.000000  | -5.899856 |

**Table S14** Cartesian coordinates of PF<sub>6</sub><sup>-</sup>

|   |           |           |          |
|---|-----------|-----------|----------|
| P | 15.870677 | 8.910843  | 8.878197 |
| F | 16.401825 | 7.758388  | 7.820516 |
| F | 17.035171 | 8.458359  | 9.957661 |
| F | 14.827407 | 7.816456  | 9.545430 |
| F | 15.339529 | 10.063298 | 9.935878 |
| F | 14.706183 | 9.363326  | 7.798733 |
| F | 16.913948 | 10.005230 | 8.210964 |

## References

1. Nakajima, Y.; Nakao, Y.; Sakaki, S.; Tamada, Y.; Ono, T.; Ozawa, F. *J. Am. Chem. Soc.* **2010**, *29*, 9934.
2. Sheldrick, G. M. SHELXS-97; University of Göttingen: Germany, 1997.
3. Sheldrick, G. M. SHELXL-97; University of Göttingen: Germany, 1997.
4. (a) Hariharan, P. C.; Pople, J. A.; *Theor. Chim. Acta* **1973**, *28*, 213. (b) Hariharan, P. C.; Pople, J. A. *Mol. Phys.* **1974**, *27*, 209.
5. Andrae, D.; Haussermann, U.; Dolg, M.; Stoll, H.; Preuss, H. *Theor. Chim. Acta* **1990**, *77*, 123.
6. Frisch, M. J.; Trucks, G. W.; Schlegel, H. B.; Scuseria, G. E.; Robb, M. A.; Cheeseman, J. R.; J. A. Montgomery, J.; Vreven, T.; Kudin, K. N.; Burant, J. C.; Millam, J. M.; Iyengar, S. S.; Tomasi, J.; Barone, V.; Mennucci, B.; Cossi, M.; Scalmani, G.; Rega, N.; Petersson, G. A.; Nakatsuji, H.; Hada, M.; Ehara, M.; Toyota, K.; Fukuda, R.; Hasegawa, J.; Ishida, M.; Nakajima, T.; Honda, Y.; Kitao, O.; Nakai, H.; Klene, M.; Li, X.; Knox, J. E.; Hratchian, H. P.; Cross, J. B.; Adamo, C.; Jaramillo, J.; Gomperts, R.; Stratmann, R. E.; Yazyev, O.; Austin, A. J.; Cammi, R.; Pomelli, C.; Ochterski, J. W.; Ayala, P. Y.; Morokuma, K.; Voth, G. A.; Salvador, P.; Dannenberg, J. J.; Zakrzewski, V. G.; Dapprich, S.; Daniels, A. D.; Strain, M. C.; Farkas, O.; Malick, D. K.; Rabuck, A. D.; Raghavachari, K.; Foresman, J. B.; Ortiz, J. V.; Cui, Q.; Baboul, A. G.; Cliord, S.; Cioslowski, J.; Stefanov, B. B.; Liu, G.; Liashenko, A.; Piskorz, P.; Komaromi, I.; Martin, R. L.; Fox, D. J.; Keith, T.; Al-Laham, M. A.; Peng, C. Y.; Nanayakkara, A.; Challacombe, M.; Gill, P. M. W.; Johnson, B.; Chen, W.; Wong, M. W.; Gonzalez, C.; Pople, J. A. *Gaussian 03 (Revision C.02)*, Gaussian, Inc., Wallingford CT 2004.
